# Supplementary material
Source: ML conference proceedings conference paper supplement (https://proceedings.neurips.cc/paper_files/paper/2020/hash/a0443c8c8c3372d662e9173c18faaa2c-Abstract.html)
Supplement: Supplementary file [file a0443c8c8c3372d662e9173c18faaa2c-Supplemental.pdf]

## A Proof of Theorem 1

Recall that under maximum entropy RL, the Q-function is defined as  $Q_{\text{ent}}^\pi(x_0, a_0) := \mathbb{E}_\pi[r_0 + \sum_{t=1}^\infty \gamma^t (r_t + c\mathcal{H}^\pi(x_t))]$  where  $\mathcal{H}^\mu(x_t)$  is the entropy of the distribution  $\pi^\mu(\cdot | x_t)$ . The Bellman equation for Q-function is naturally

$$Q^\pi(x_0, a_0) = \mathbb{E}_\pi[r_0 + \gamma c\mathcal{H}^\pi(x_1) + \gamma Q^\pi(x_1, a_1)].$$

Let the optimal policy be  $\pi_{\text{ent}}^*$ . The relationship between the optimal policy and its Q-function is  $\pi_{\text{ent}}^*(a | x) \propto \exp(Q_{\text{ent}}^{\pi_{\text{ent}}^*}(x, a)/c)$ . We seek to establish  $Q_{\text{ent}}^{\pi_{\text{ent}}^*}(x_0, a_0) \geq \mathbb{E}_\mu[r_0 + \gamma c\mathcal{H}^\mu(x_1) + \sum_{t=1}^{T-1} \gamma^t (r_t + c\mathcal{H}^\mu(x_{t+1})) + \gamma^T Q_{\text{ent}}^\pi(x_T, a_T)]$  for any policy  $\mu, \pi$ .

We prove the results using induction. For the base case  $T = 1$ ,

$$\begin{aligned} Q_{\text{ent}}^{\pi_{\text{ent}}^*}(x_0, a_0) &= \mathbb{E}_{\pi_{\text{ent}}^*}[r_0 + \gamma c\mathcal{H}^{\pi_{\text{ent}}^*}(x_1) + \gamma Q_{\text{ent}}^{\pi_{\text{ent}}^*}(x_1, a_1)] \\ &= \mathbb{E}_{x_1 \sim p(\cdot | x_0, a_0)}[r_0 + \gamma c\mathcal{H}^{\pi_{\text{ent}}^*}(x_1) + \gamma \mathbb{E}_{\pi_{\text{ent}}^*}[Q_{\text{ent}}^{\pi_{\text{ent}}^*}(x_1, a_1)]] \\ &\geq \mathbb{E}_{x_1 \sim p(\cdot | x_0, a_0)}[r_0 + \gamma c\mathcal{H}^\mu(x_1) + \gamma \mathbb{E}_\mu[Q_{\text{ent}}^{\pi_{\text{ent}}^*}(x_1, a_1)]] \\ &\geq \mathbb{E}_{x_1 \sim p(\cdot | x_0, a_0)}[r_0 + \gamma c\mathcal{H}^\mu(x_1) + \gamma \mathbb{E}_\mu[Q_{\text{ent}}^\pi(x_1, a_1)]]. \end{aligned} \tag{10}$$

In the above, to make the derivations clear, we single out the reward  $r_0$  and state  $x_1 \sim p(\cdot | x_0, a_0)$ , note that the distributions of these two quantities do not depend on the policy. The first inequality follows from the fact that  $\pi_{\text{ent}}^*(\cdot | x) = \arg \max_\pi [c\mathcal{H}^\pi(x) + \mathbb{E}_{a \sim \pi(\cdot | x)} Q_{\text{ent}}^{\pi_{\text{ent}}^*}(x, a)]$ . The second inequality follows from  $Q_{\text{ent}}^{\pi_{\text{ent}}^*}(x, a) \geq Q_{\text{ent}}^\pi(x, a)$  for any policy  $\pi$ .

With the base case in place, assume that the result holds for  $T \leq k - 1$ . Consider the case  $T = k$

$$\begin{aligned} \mathbb{E}_\mu[r_0 + \gamma c\mathcal{H}^\mu(x_1) + \sum_{t=1}^{T-1} \gamma^t (r_t + c\mathcal{H}^\mu(x_{t+1})) + \gamma^T Q_{\text{ent}}^\pi(x_T, a_T)] \\ \leq \mathbb{E}_\mu[r_0 + \gamma c\mathcal{H}^\mu(x_1) + \gamma \mathbb{E}_\mu[Q_{\text{ent}}^{\pi_{\text{ent}}^*}(x_1, a_1)]] \\ \leq Q_{\text{ent}}^{\pi_{\text{ent}}^*}(x_0, a_0), \end{aligned}$$

When  $\pi = \mu$  we have the special case  $\mathbb{E}_\mu[\sum_{t=0}^\infty \gamma^t r_t] \leq V^{\pi^*}(x_0)$ , the lower bound which motivated the original lower-bound Q-learning based self-imitation learning [8].

## B Proof of Theorem 2

For notational simplicity, let  $\mathcal{U} := (\mathcal{T}^\mu)^{n-1} \mathcal{T}^\pi$  and let  $\tilde{\mathcal{U}}Q(x, a) := Q(x, a) + [UQ(x, a) - Q(x, a)]_+$ . As a result, we could write  $\mathcal{T}_{\text{n,sil}}^{\alpha, \beta} = (1 - \beta)\mathcal{T}^\pi + (1 - \alpha)\beta\tilde{\mathcal{U}} + \alpha\beta\mathcal{U}$ .

First, we prove the contraction properties of  $\mathcal{T}_{\beta, \text{n,sil}}^\mu$ . Note that by construction  $|\tilde{\mathcal{U}}Q_1(x, a) - \tilde{\mathcal{U}}Q_2(x, a)| \leq \max(|Q_1(x, a) - Q_2(x, a)|, |\mathcal{U}Q_1(x, a) - \mathcal{U}Q_2(x, a)|) \leq \|Q_1 - Q_2\|_\infty$ . Then through the triangle inequality,  $\|\mathcal{T}_{\text{n,sil}}^{\alpha, \beta} Q_1 - \mathcal{T}_{\text{n,sil}}^{\alpha, \beta} Q_2\|_\infty \leq (1 - \beta)\|\mathcal{T}^\pi Q_1 - \mathcal{T}^\pi Q_2\|_\infty + (1 - \alpha)\beta\|\tilde{\mathcal{U}}Q_1 - \tilde{\mathcal{U}}Q_2\|_\infty + \alpha\beta\|\mathcal{U}Q_1 - \mathcal{U}Q_2\|_\infty \leq [(1 - \beta)\gamma + (1 - \alpha)\beta + \alpha\beta\gamma^n]\|Q_1 - Q_2\|_\infty$ . This proves the upper bound on the contraction rates of  $\mathcal{T}_{\text{n,sil}}^{\alpha, \beta}$ . Let  $\eta(\alpha, \beta) = (1 - \beta)\gamma + (1 - \alpha)\beta + \alpha\beta\gamma^n$  and set  $\eta(\alpha, \beta) < \gamma$ , we deduce  $\alpha > \frac{1 - \gamma}{1 - \gamma^n}$ .

Next, we show properties of the fixed point  $\tilde{Q}^{\alpha, \beta}$ . This point uniquely exists because  $\Gamma(\mathcal{T}_{\text{n,sil}}^{\alpha, \beta}) < 1$  if  $(1 - \alpha)\beta < 1$ . From  $\mathcal{T}_{\text{n,sil}}^{\alpha, \beta} \tilde{Q}^{\alpha, \beta} = \tilde{Q}^{\alpha, \beta}$ , we could derive by rearranging terms  $(1 - \beta)(\mathcal{T}^\pi \tilde{Q} - \tilde{Q}) + \alpha\beta(\mathcal{U}\tilde{Q} - \tilde{Q}) = -(1 - \alpha)\beta(\tilde{\mathcal{U}}\tilde{Q} - \tilde{Q}) \leq 0$ . This further implies that  $\mathcal{T}^\pi \tilde{Q} \leq \tilde{Q}$ . Now let  $\mathcal{T} := \frac{(1 - \beta)}{1 - \beta + \alpha\beta} \mathcal{T}^\pi + \frac{\alpha\beta}{1 - \beta + \alpha\beta} \mathcal{U}$ . This simplifies to  $\mathcal{T}\tilde{Q} - \tilde{Q} \leq 0$ . By the monotonicity of  $\mathcal{T}$ , we see  $Q^{t\pi + (1-t)\mu^{n-1}\pi} \geq \lim_{k \rightarrow \infty} (\mathcal{T})^k \tilde{Q} = Q^\pi$  where  $t = \frac{1 - \beta}{1 - \beta + \alpha\beta}$ .

For the another set of inequalities, define  $\tilde{H}Q := (1 - \beta)\mathcal{T}^* + (1 - \alpha)\beta\tilde{\mathcal{U}}Q + \alpha\beta(\mathcal{T}^*)^n$ , where recall that  $\mathcal{T}^*$  is the optimality Bellman operator.

First, note  $\tilde{H}$  has  $Q^{\pi^*}$  as its unique fixed point. To see why, let  $\tilde{Q}$  be a generic fixed point of  $\tilde{H}$  such that  $\tilde{H}\tilde{Q} = \tilde{Q}$ . By rearranging terms, it follows that  $(1 - \beta)(\mathcal{T}^*\tilde{Q} - \tilde{Q}) + \alpha\beta((\mathcal{T}^*)^n\tilde{Q} - \tilde{Q}) = -(1 - \alpha)\beta(\tilde{U}\tilde{Q} - \tilde{Q}) \leq 0$ . However, by construction  $(\mathcal{T}^*)^i Q \geq Q, \forall i \geq 1, \forall Q$ . This implies that  $(1 - \beta)(\mathcal{T}^*\tilde{Q} - \tilde{Q}) + \alpha\beta((\mathcal{T}^*)^n\tilde{Q} - \tilde{Q}) \geq 0$ . As a result,  $(1 - \beta)(\mathcal{T}^*\tilde{Q} - \tilde{Q}) + \alpha\beta((\mathcal{T}^*)^n\tilde{Q} - \tilde{Q}) = 0$  and  $\tilde{Q}$  is a fixed point of  $t\mathcal{T}^* + (1 - t)(\mathcal{T}^*)^n$ . Since  $t\mathcal{T}^* + (1 - t)(\mathcal{T}^*)^n$  is strictly contractive as  $\Gamma(t\mathcal{T}^* + (1 - t)(\mathcal{T}^*)^n) \leq t\gamma + (1 - t)\gamma^n \leq \gamma < 1$ , its fixed point is unique. It is straightforward to deduce that  $Q^{\pi^*}$  is a fixed point of  $t\mathcal{T}^* + (1 - t)(\mathcal{T}^*)^n$  and we conclude that the only possible fixed point of  $\tilde{H}$  is  $\tilde{Q} = Q^{\pi^*}$ . Finally, recall that by construction  $\tilde{H}Q \geq Q, \forall Q$ . By monotonicity,  $Q^{\pi^*} = \lim_{k \rightarrow \infty} (\tilde{H})^k \tilde{Q}^{\alpha, \beta} \geq \tilde{Q}^{\alpha, \beta}$ . In conclusion, we have shown  $Q^{t\pi + (1-t)\mu^{n-1}\mu} \leq \tilde{Q}^{\alpha, \beta} \leq Q^{\pi^*}$ .

## C Additional theoretical results

**Theorem 3.** Let  $\pi^*$  be the optimal policy and  $V^{\pi^*}$  its value function under standard RL formulation. Given a partial trajectory  $(x_t, a_t)_{t=0}^n$ , the following inequality holds for any  $n$ ,

$$V^{\pi^*}(x_0) \geq \mathbb{E}_\mu \left[ \sum_{t=0}^{n-1} \gamma^t r_t + \gamma^n V^{\pi^*}(x_n) \right] \quad (11)$$

*Proof.* Let  $\pi, \mu$  be any policy and  $\pi^*$  the optimal policy. We seek to show  $V^{\pi^*}(x_0) \geq \mathbb{E}_\mu[\sum_{t=0}^{T-1} \gamma^t r_t + \gamma^T V^{\pi^*}(x_T)]$  for any  $T \geq 1$ .

We prove the results using induction. For the base case  $T = 1$ ,  $V^{\pi^*}(x_0) = \mathbb{E}_{\pi^*}[Q^{\pi^*}(x_0, a_0)] \geq \mathbb{E}_\mu[Q^{\pi^*}(x_0, a_0)] = \mathbb{E}_\mu[r_0 + \gamma V^{\pi^*}(x_1)] \geq \mathbb{E}_\mu[r_0 + \gamma V^\pi(x_1)]$ , where the first inequality comes from the fact that  $\pi^*(\cdot | x_0) = \arg \max_a Q^{\pi^*}(x_0, a)$ . Now assume that the statement holds for any  $T \leq k - 1$ , we proceed to the case  $T = k$ .

$$\begin{aligned} \mathbb{E}_\mu \left[ \sum_{t=0}^{k-1} \gamma^t r_t + \gamma^k V^{\pi^*}(x_k) \right] &= \mathbb{E}_\mu \left[ r_0 + \gamma \mathbb{E}_\mu \left[ \sum_{t=0}^{k-2} \gamma^t r_t + \gamma^{k-1} V^{\pi^*}(x_k) \right] \right] \\ &\leq \mathbb{E}_\mu [r_0 + \gamma V^{\pi^*}(x_1)] \leq V^{\pi^*}(x_0), \end{aligned}$$

where the first inequality comes from the induction hypothesis and the second inequality follows naturally from the base case. This implies that  $n$ -step quantities of the form  $V^{\pi^*}(x_0) \geq \mathbb{E}_\mu[\sum_{t=0}^{n-1} \gamma^t r_t + \gamma^n V^{\pi^*}(x_n)]$  are lower bounds of the optimal value function  $V^{\pi^*}(x_0)$  for any  $n \geq 1$ .  $\square$

## D Experiment details

**Implementation details.** The algorithmic baselines for deterministic actor-critic (TD3 and DDPG) are based on OpenAI Spinning Up <https://github.com/openai/spinningup> [51]. The baselines for stochastic actor-critic is based on PPO [18] and SIL+PPO [8] are based on the author code base <https://github.com/junhyukoh/self-imitation-learning>. Throughout the experiments, all optimizations are carried out via Adam optimizer [52].

**Architecture.** Deterministic actor-critic baselines, including TD3 and DDPG share the same network architecture following [51]. The Q-function network  $Q_\theta(x, a)$  and policy  $\pi_\phi(x)$  are both 2-layer neural network with  $h = 300$  hidden units per layer, before the output layer. Hidden layers are interleaved with  $\text{relu}(x)$  activation functions. For the policy  $\pi_\phi(x)$ , the output is stacked with a  $\text{tanh}(x)$  function to ensure that the output action is in  $[-1, 1]$ . All baselines are run with default hyper-parameters from the code base.

Stochastic actor-critic baselines (e.g. PPO) implement value function  $V_\theta(x)$  and policy  $\pi_\phi(a | x)$  both as 2-layer neural network with  $h = 64$  hidden units per layer and  $\text{tanh}$  activation. The stochastic policy  $\pi_\phi(a | x)$  is a Gaussian  $a \sim \mathcal{N}(\mu_\phi(x), \sigma^2)$  with state-dependent mean  $\mu_\phi(x)$  and a global variance parameter  $\sigma^2$ . Other missing hyper-parameters take default values from the code base.

Table 1: Summary of the performance of algorithmic variants across benchmark tasks. We use *uncorrected* to denote prioritized sampling without IS corrections. Return-based SIL is represented as SIL with  $n = \infty$ . For each task, algorithmic variants with top performance are highlighted (two are highlighted if they are not statistically significantly different). Each entry shows mean  $\pm$  std performance.

| Tasks          | SIL $n = 5$                      | SIL $n = 5$<br>(uncorrected)     | SIL $n = 1$<br>(uncorrected)      | 5-step                          | 1-step                            | SIL $n = \infty$ |
|----------------|----------------------------------|----------------------------------|-----------------------------------|---------------------------------|-----------------------------------|------------------|
| DMWALKERRUN    | <b>642 <math>\pm</math> 107</b>  | <b>675 <math>\pm</math> 15</b>   | 500 $\pm$ 138                     | 246 $\pm$ 49                    | 274 $\pm$ 100                     | 320 $\pm$ 111    |
| DMWALKERSTAND  | <b>979 <math>\pm</math> 2</b>    | 947 $\pm$ 18                     | 899 $\pm$ 55                      | 749 $\pm$ 150                   | 487 $\pm$ 177                     | 748 $\pm$ 143    |
| DMWALKERWALK   | 731 $\pm$ 151                    | 622 $\pm$ 197                    | 601 $\pm$ 108                     | <b>925 <math>\pm</math> 10</b>  | 793 $\pm$ 121                     | 398 $\pm$ 203    |
| DMCHEETAHRUN   | <b>830 <math>\pm</math> 36</b>   | 597 $\pm$ 64                     | 702 $\pm$ 72                      | 553 $\pm$ 92                    | 643 $\pm$ 83                      | 655 $\pm$ 59     |
| ANT            | <b>4123 <math>\pm</math> 364</b> | 3059 $\pm$ 360                   | <b>3166 <math>\pm</math> 390</b>  | 1058 $\pm$ 281                  | 3968 $\pm$ 401                    | 3787 $\pm$ 411   |
| HALFCHEETAH    | 8246 $\pm$ 784                   | 9976 $\pm$ 252                   | <b>10417 <math>\pm</math> 364</b> | 6178 $\pm$ 151                  | <b>10100 <math>\pm</math> 481</b> | 8389 $\pm$ 386   |
| ANT(B)         | <b>2954 <math>\pm</math> 54</b>  | 1690 $\pm$ 564                   | 1851 $\pm$ 416                    | <b>2920 <math>\pm</math> 84</b> | 1866 $\pm$ 623                    | 1884 $\pm$ 631   |
| HALFCHEETAH(B) | <b>2619 <math>\pm</math> 129</b> | <b>2521 <math>\pm</math> 128</b> | 2420 $\pm$ 109                    | 1454 $\pm$ 338                  | 2544 $\pm$ 31                     | 2014 $\pm$ 378   |

## D.1 Further implementation and hyper-parameter details

**Generalized SIL for deterministic actor-critic.** We adopt TD3 [27] as the baseline for deterministic actor-critic. TD3 maintains a Q-function network  $Q_\theta(x, a)$  and a deterministic policy network  $\pi_\theta(x)$  with parameter  $\theta$ . The SIL subroutines adopt a prioritized experience replay buffer: the return-based SIL samples tuples according to the priority  $[R^\mu(x, a) - Q_\theta(x, a)]_+$  and minimizes the loss function  $[R^\mu(x, a) - Q_\theta(x, a)]_+$ ; the generalized SIL samples tuples according to the priority  $[L^{\pi, \mu, n}(x, a) - Q_\theta(x, a)]_+$  and minimizes the loss function  $[L^{\pi, \mu, n}(x, a) - Q_\theta(x, a)]_+$ . The experience replay adopts the parameter  $\alpha = 0.6, \beta = 0.1$  [53]. Throughout the experiments, TD3-based algorithms all employ  $\alpha = 10^{-3}$  for the network updates.

To calculate the update target  $L^{\pi, \mu, n}(x_0, a_0) = \sum_{t=0}^{n-1} \gamma^t r_t + Q_{\theta'}(x_n, \pi_{\theta'}(x_n))$  with partial trajectory  $(x_t, a_t, r_t)_{t=0}^n$  along with the target value network  $Q_{\theta'}(x, a)$  and policy network  $\pi_{\theta'}(x)$ . The target network is slowly updated as  $\theta' = \tau\theta' + (1 - \tau)\theta$  where  $\tau = 0.995$  [14].

**Generalized SIL for stochastic actor-critic.** We adopt PPO [18] as the baseline algorithm and implement modifications on top of the SIL author code base <https://github.com/junhyukoh/self-imitation-learning> as well as the original baseline code <https://github.com/openai/baselines> [54]. All PPO variants use the default learning rate  $\alpha = 3 \cdot 10^{-4}$  for both actor  $\pi_\theta(a | x)$  and critic  $V_\theta(x)$ . The SIL subroutines are implemented as a prioritized replay with  $\alpha = 0.6, \beta = 0.1$ . For other details of SIL in PPO, please refer to the SIL paper [8].

The only difference between generalized SIL and SIL lies in the implementation of the prioritized replay. SIL samples tuples according to the priority  $[R^\mu(x, a) - V_\theta(x)]_+$  and minimize the SIL loss function  $([R^\mu(x, a) - V_\theta(x)]_+)^2$  for the value function, and  $-\log \pi_\theta(a | x)[R^\mu(x, a) - V_\theta(x)]_+$  for the policy. Generalized SIL samples tuples according to the priority  $([L^{\pi, \mu, n}(x, a) - V_\theta(x)]_+)^2$ , and minimize the loss  $([L^{\pi, \mu, n}(x, a) - V_\theta(x)]_+)^2$  and  $-\log \pi_\theta(a | x)[L^{\pi, \mu, n}(X, a) - V_\theta(x)]_+$  for the value function/policy respectively.

To calculate the update target  $L^{\pi, \mu, n}(x_0, a_0) = \sum_{t=0}^{n-1} \gamma^t r_t + V_{\theta'}(x_n)$  with partial trajectory  $(x_t, a_t, r_t)_{t=0}^n$  along with the target value network  $V_{\theta'}(x)$ . We apply the target network technique to stabilize the update, where  $\theta'$  is a delayed version of the major network  $\theta$  and is updated as  $\theta' = \tau\theta' + (1 - \tau)\theta$  where  $\tau = 0.995$ .

## D.2 Additional experiment results

**Comparison across related baselines.** We make clear the comparison between related baselines in Table 1. We present results for  $n$ -step TD3 with  $n \in \{1, 5\}$ ; TD3 with generalized SIL with  $n = 5$  and its variants with different setups for prioritized sampling; TD3 with return-based SIL ( $n = \infty$ ). We show the results across all 8 tasks - in each entry of Table 1 we show the mean  $\pm$  std of performance averaged over 3 seeds. The performance of each algorithmic variant is the average testing performance of the last  $10^4$  training steps (from a total of  $10^6$  training steps). The best

Table 2: Comparison between different replay schemes. For each task, algorithmic variants with top performance are highlighted (two are highlighted if they are not statistically significantly different). Each entry shows mean  $\pm$  std performance.

| Tasks          | SIL $n = 5$                      | SIL $n = 5$<br>(uncorrected)     | SIL $n = 5$<br>(no priority)    |
|----------------|----------------------------------|----------------------------------|---------------------------------|
| DMWALKERUN     | <b>642 <math>\pm</math> 107</b>  | <b>675 <math>\pm</math> 15</b>   | 424 $\pm$ 127                   |
| DMWALKERSTAND  | <b>979 <math>\pm</math> 2</b>    | 947 $\pm$ 18                     | 634 $\pm$ 184                   |
| DMWALKERWALK   | <b>731 <math>\pm</math> 151</b>  | 622 $\pm$ 197                    | <b>766 <math>\pm</math> 103</b> |
| DMCHEETAHRUN   | <b>830 <math>\pm</math> 36</b>   | 597 $\pm$ 64                     | <b>505 <math>\pm</math> 182</b> |
| ANT            | <b>4123 <math>\pm</math> 364</b> | 3059 $\pm$ 360                   | 4358 $\pm$ 496                  |
| HALFCHEETAH    | 8246 $\pm$ 784                   | <b>9976 <math>\pm</math> 252</b> | 8927 $\pm$ 596                  |
| ANT(B)         | <b>2954 <math>\pm</math> 54</b>  | 1690 $\pm$ 564                   | <b>2910 <math>\pm</math> 88</b> |
| HALFCHEETAH(B) | <b>2619 <math>\pm</math> 129</b> | <b>2521 <math>\pm</math> 128</b> | 2284 $\pm$ 85                   |

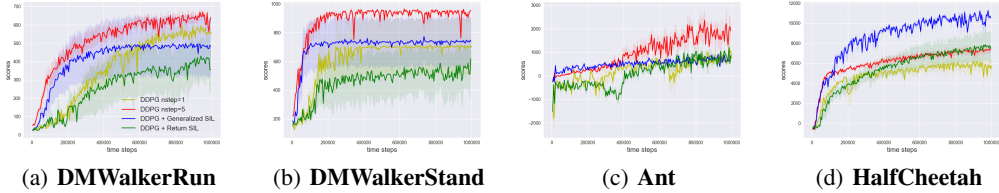

Figure 4: Standard evaluations on 4 simulation tasks for DDPG baselines. Different colors represent different algorithmic variants. Each curve shows the mean  $\pm 0.5$ std of evaluation performance during training, averaged across 3 random seeds. The x-axis shows the time steps and the y-axis shows the cumulative returns.

algorithmic variant is highlighted in bold. We see that in general generalized SIL with  $n = 5$  performs the best.

**Ablation on the prioritized sampling.** In prioritized sampling [53], when the tuples  $d = (x_i, a_i, r_i)_{i=0}^n \in \mathcal{D}$  are sampled with priorities  $s_d$ , it is sampled with probability  $p(d) \propto s_d^\alpha$ . During updates, the IS correction consists in optimizing the loss  $\mathbb{E}_d[w_d l_d]$  where  $l_d$  is the loss computed from tuple  $d$  and the IS correction weight  $w_d = (N \cdot p_d)^{-\beta}$  where  $N$  is the number of tuples in the buffer  $\mathcal{D}$ .

We compare several prioritized sampling variants of generalized SIL in Table 2. There are three variants: SIL  $n = 5$  with both prioritized sampling ( $\alpha = 0.6$ ) and IS correction ( $\beta = 0.1$ ); SIL  $n = 5$  with prioritized sampling ( $\alpha = 0.6$ ) only and without IS correction ( $\beta = 0.0$ ); SIL  $n = 5$  with no prioritized sampling ( $\alpha = \beta = 0.0$ ). The performance setup in Table 2 is the same as in Table 1. It can be seen from Table 2 that generalized SIL performs the best with full prioritized sampling.

**Results on DDPG.** DDPG is a baseline actor-critic algorithm with a deterministic actor [15]. Compared to TD3, DDPG does not adopt a double-critic approach [27] and suffers from over-estimation bias of the Q-function [30].

We present the baseline evaluation result of DDPG in Figure 4, where we show the results for a few variants: DDPG with  $n$ -step update,  $n \in \{1, 5\}$ ; DDPG with generalized SIL  $n = 5$  and DDPG with return-based SIL ( $n = \infty$ ). We see that the performance gains of DDPG with generalized SIL  $n = 5$  are not as significant - indeed, overall DDPG with  $n = 5$  has the best performance. We speculate that this is partly due to the over-estimation bias of DDPG: the formulation of generalized SIL is motivated by shifting the fixed point  $Q^\pi$  with a positive bias. The baseline algorithm benefits the most from generalized SIL when indeed in practice  $Q_\theta \approx Q^\pi$ . However, this is not the case for DDPG as the algorithm already has high positive bias in that  $Q^\theta > Q^\pi$ , which reduces the potential gains that come from generalized SIL.
